# Supplementary material for: Cost effectiveness of thiamine supplementation in pregnant and post-partum women to prevent infantile beriberi deaths in Northeast India
Source: Research Square preprint supplement (doi:10.21203/rs.3.rs-7813280/v1), 2025-11-26
Supplement: Supplementary file 1 [file 4ed50460b8e857e1f81fd25e.docx]

Supplementary material Top of Form

Table 1: Compilation of figures for thiamine deficiency across different age groups in Makunda hospital

| **Beriberi cases at Makunda hospital** | **2018** | **2019** | **2020** | **2021** | **Total** |
| --- | --- | --- | --- | --- | --- |
| Total IP admission (of all patients) | 14731 | 15297 | 13021 | 13496 | 56545 |
| Infants admitted and managed for infantile cardiac form of beri beri | 32 | 44 | 48 | 52 | **176** |
| Admitted Pregnant or lactating mothers with dry beri beri from Assam and, Tripura | 38 | 46 | 62 | 19 | **165** |
| Other adults (non-pregnant women or men) admitted or managed as out-patient with adult dry or wet beri beri | 138 | 160 | 163 | 144 | **768** |

Top of Form
