# Supplementary material for: Cost effectiveness of thiamine supplementation in pregnant and post-partum women to prevent infantile beriberi deaths in Northeast India
Source: Research Square preprint supplement (doi:10.21203/rs.3.rs-7813280/v1), 2025-11-26
Supplement: Supplementary file 2 [file dd1322f2e2c9946c6bb5c507.docx]

**
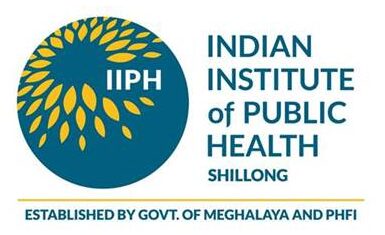
Interview Guide**

**Respondent Details**

**Name (optional):**

**Age: Gender:**

**Profession:**

1. Qualification
2. Position:
3. Total years of experience
4. Location (Address/District/Block)
5. Hospital/Health Centre name:
6. **The prevalence of thiamine deficiency in their practice**

Do you see cases of thiamine deficiency in your practice?

If yes, how do they present?

In children –

In mothers-

In others –

What are the manifestations of thiamine deficiency that you come across (wet beri beri, dry beri beri etc) (ailments)

1. **Criteria they use in making a diagnosis of thiamine deficiency**

When did you first start suspecting thiamine deficiency as a potential diagnosis? Were there some triggering incident?

What challenges do you face in making a clear diagnosis?

Can you give me an idea of how often you see such cases?

In the past one year how many would you have seen?

After you started seeing cases did you make any changes to your practice pattern? Such as routing supplementation> do explain….

1. Can you describe the general profile of patients coming to your centre with respect to thiamine deficiency?

- Socio-economic background
- Location- from other districts?
- Age group of the patients
- Common health complaints

1. Treatment approaches and challenges they face in managing Thiamine Deficiency
   - What are the clinical symptoms/representations that you recommend thiamine as the treatment?
   - Is tablet or IV administered? When is it administered?
   - Is supplementation the first type of intervention provided or did you give some other treatment when thiamine deficiency cases are suspected?
   - What according to you are the challenges when it comes to managing thiamine deficiency cases?

- Can you share any recommendations that you have towards the management of thiamine deficiency?

1. Based on what you have seen with regard to thiamine deficiency what preventive measures would you suggest to prevent the deficiency in the given population? Elaborate.
2. Any other observation and recommendations on offer by the Clinical expert.
